RESEARCH ARTICLE

# The Burden of MDR/XDR Tuberculosis in Coastal Plains Population of China

Xiujun Yang<sup>1‡</sup>, Yanli Yuan<sup>1‡</sup>, Yu Pang<sup>2‡</sup>, Bo Wang<sup>1</sup>, Yunlong Bai<sup>1</sup>, Yanhua Wang<sup>1</sup>, Baozhu Yu<sup>1</sup>, Zhiying Zhang<sup>3</sup>, Ming Fan<sup>1\*</sup>, Yanlin Zhao<sup>2\*</sup>

**1** Jilin Province Center for Disease Control and Prevention, Changchun, China, **2** Chinese Center for Disease Control and Prevention, Beijing, China, **3** PATH Office, Beijing, China

‡ These authors contributed equally to this work.

\* [zhaoyanlin@chinatb.org](mailto:zhaoyanlin@chinatb.org) (YZ); [jk7977068@163.com](mailto:jk7977068@163.com) (MF)

## Abstract

### Background

We conducted a first baseline survey in Jilin Province of China to determine the proportion of drug-resistant tuberculosis (TB), and to analyze risk factors associated with the emergence of drug-resistance.

### Methodology/Principal Findings

Thirty counties in Jilin Province were randomly selected as survey sites using a stratified cluster sampling method. People enrolled in the survey were new and re-treated, smear-positive pulmonary TB patients newly enrolled in local TB control and prevention institutions during the survey period. Sputum samples were collected, and the susceptibility of bacterial strains to anti-TB drugs was analyzed by proportion method. Based on the survey results, we estimated the number of drug-resistant TB patients and analyzed the risk factors associated with the emergence of drug resistance. Of 1,174 new TB patients and 597 re-treated TB patients, 8.6% and 23.2% were multi-drug resistant (MDR)-TB patients, respectively. Approximately 12% of MDR-TB patients were extensively drug-resistant. We estimate that approximately 1,290 new MDR-TB cases develop in Jilin Province every year. Of these, 810 cases would be new patients, and 480 cases would involve re-treated patients. Risk factors associated with MDR-TB include employment status, educational background, and income level.

### Conclusions/Significance

Jilin Province remains one of the highest-burden areas in China for drug-resistant TB. The higher number of MDR-TB among new cases suggested that the transmission of drug-resistant strains in Jilin is an urgent problem in the MDR-TB control and prevention system of Jilin Province. Improving the treatment compliance of TB patients and the quality of medical care in public health institutions is urgently needed.

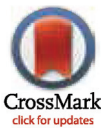

## OPEN ACCESS

**Citation:** Yang X, Yuan Y, Pang Y, Wang B, Bai Y, Wang Y, et al. (2015) The Burden of MDR/XDR Tuberculosis in Coastal Plains Population of China. PLoS ONE 10(2): e0117361. doi:10.1371/journal.pone.0117361

**Academic Editor:** José-María García-García, Hospital San Agustín. Aviles. Asturias. Spain, SPAIN

**Received:** May 29, 2014

**Accepted:** December 22, 2014

**Published:** February 17, 2015

**Copyright:** © 2015 Yang et al. This is an open access article distributed under the terms of the [Creative Commons Attribution License](https://creativecommons.org/licenses/by/4.0/), which permits unrestricted use, distribution, and reproduction in any medium, provided the original author and source are credited.

**Data Availability Statement:** All relevant data are within the paper and its Supporting Information files.

## Introduction

China has the second-highest burden of tuberculosis (TB) in the world [1–4]. According to WHO estimates, approximately 1 million new TB cases and 54,200 MDR-TB cases in 2013 [5] occur in China. In 2007–08, China conducted a nationwide drug-resistance survey, and the results showed that the proportion of multi-drug resistant (MDR)-TB in smear-positive pulmonary TB patients was 8.32%. Of these, the proportion of MDR-TB in new patients and re-treated patients was 5.71% and 25.64%, respectively [4]. It is important to consider the incidence of drug-resistant TB in evaluating and improving disease prevention strategies in China [6].

The incidence of TB and MDR-TB varies widely across China because of the country's vast geographic area, large population, uneven population distribution, varied climate types, and diverse levels of economic development [6–9]. The incidence of drug resistance is higher in the north, west, and central areas of China, and lower in south and east China [6, 9, 10]. Jilin Province is located in northeast China, with a total of 9 prefectures consisting of 60 counties. There are 27,494,100 individuals living in Jilin, of which, 45% belong to rural population. As one of the major agricultural provinces, Jilin provides the largest per capita reserves of grain crop in China. In addition to agriculture, Jilin is also the national industry center for automobiles and train carriages. According to national policy, the suspected TB patients diagnosed in general hospital must be transferred to local TB control and prevention institution to receive the standardized treatment in Jilin Province. The free tuberculosis services are only provided for pulmonary tuberculosis patients seeking care in public health system, while this policy is not suitable for other medical institutions. Despite containment supports implemented by national authorities and the international community, the burden of TB and drug-resistant TB remains serious, while data on the incidence of drug-resistant TB in Jilin Province are not available at present. In 2008–09, the Jilin Province Center for Disease Control and Prevention (CDC) performed a survey of drug-resistant TB in Jilin Province to determine the proportion and incidence of drug-resistant TB and the risk factors associated with drug-resistant TB, especially MDR-TB. The goal was to fully understand the current status of and trends in TB incidence in Jilin Province and to provide a scientific basis for formulating and improving Jilin Province's TB control and prevention program.

## Materials and Methods

### Ethics

The survey protocol was approved by the Ethical Committee of the Jilin Province CDC. All enrolled patients signed informed consent forms.

### Sampling Method

The TB Reference Laboratory of the Jilin Province CDC was responsible for implementing this survey. Following the cluster-randomized sampling method recommended by WHO guidelines for surveillance of drug-resistance in tuberculosis [11], the sample calculation for new smear-positive TB patients was based on the following hypothesis: the proportion of rifampin resistance was 9%, and the precision was  $\pm 1.8\%$  when the confidence interval (CI) was 95%. For re-treated, smear-positive TB patients, the proportion of rifampin resistance was 16%, and the precision was  $\pm 3.2\%$  when the CI was 95%. Accounting for possible loss due to culture failure and bacterial strains transport, the sample size was increased by 15%. It was estimated that the required sample size of new smear-positive TB patients was 1,165 cases, and that of re-treated, smear-positive TB patients was 605 cases.

Based on the required sample size and operability, the number of counties was confirmed as 30, and the distribution of sites was calculated according to the number of smear-positive TB patients newly registered in various cities at the prefecture level in 2007. Then the county TB control and prevention institutions of each prefecture were selected from corresponding prefecture as survey sites. The total population of the 30 counties (which include cities and districts) was 15,477,700 people, accounting for 56% of the province's total population. On the basis of these calculations, every project site needed to enroll 40 new smear-positive TB patients and 21 re-treated, smear-positive TB patients.

People enrolled in the survey were new and re-treated, smear-positive pulmonary TB patients newly enrolled in local TB control and prevention institutions during the survey period. All the new cases or retreatment cases were consecutively enrolled, respectively. Because the enrollment of new cases was faster than that of retreated cases, the recruitment of new cases would be stopped if the new case number reached the requirement of sample size. A new pulmonary TB patient was defined as a patient who had never received anti-TB drug therapy or who had received therapy for less than one month. The re-treated pulmonary TB patient was defined as a patient who had received anti-TB drug therapy for more than one month.

## Patient Data Collection

All those administering the survey received training from the China CDC and the Jilin Province CDC. Each enrolled patient was independently interviewed by two survey administrators using the same questionnaire. The content of the questionnaire included basic societal data and treatment history ([S1 Table](#)). Patients with inconsistent interview results were reinterviewed and rechecked by a third survey administrator.

## Laboratory Examination

Each enrolled patient sent three sputum samples for smear microscopy and two sputum samples for mycobacterium culture. The cultures were done using the simple method on the acidic Lowenstein-Jensen (L-J) medium. An equal quantity of 4% NaOH was added into the sputum specimen, which was vortically shaken and digested for 15 minutes. Then 0.1ml of digested liquid was inoculated on the L-J medium and cultured in an incubator at 37°C. The culture tube was observed to exclude fast-growing microbes and other contaminants at three days and at one week after inoculation, and then observed weekly. Negative results were reported when no colony growth was observed at the end of the eighth week [4]. Positive cultures were sent to the Jilin Province TB Reference Laboratory to perform a conventional drug susceptibility test (DST) and bacterial species identification.

The DST was done by use of the proportion method on a solid L-J medium at the Jilin Province TB Reference Laboratory. The medium contained anti-TB drugs, and the final concentration of the drugs used was: 0.2 µg/ml for isoniazid, 40 µg/ml for rifampin, 4 µg/ml for streptomycin, 2 µg/ml for ethambutol, 40 µg/ml for kanamycin, and 2 µg/ml for ofloxacin. Mycobacterium species identification was done by growth test on a medium containing p-nitrobenzoic acid (PNB) and 2-thiophenecarboxylic acid hydrazide (TCH). The concentration of the drugs was: 500 mg/ml for PNB and 5 mg/ml for TCH [3, 4]. The Jilin Province TB Reference Laboratory has taken part in DST proficiency tests of the National TB Reference Laboratory since 2005, and the results of the test were qualified. Drug-resistant TB was defined as tuberculosis with drug resistance to any of the antituberculosis drugs in the survey. MDR-TB was defined as tuberculosis resistant to both isoniazid and rifampin, and extensive drug resistance (XDR)-TB was defined as tuberculosis resistant to at least isoniazid, rifampin, ofloxacin, and kanamycin [4].

## Statistical Analysis

All collected data were entered using Epi Data 3.02 software (EpiData Association, Odense, Denmark). In order to ensure accuracy, data were entered by two operators, and after entry, 10% of entered data were randomly selected and rechecked. The number of drug-resistant TB patients in Jilin Province was calculated using the method published by WHO [3, 12]. The incidence of drug-resistant TB in new TB patients was calculated by multiplying the estimated incidence of new tuberculosis cases of Jilin province in 2009 by the proportion of those cases that were drug-resistant. The incidence of re-treated drug-resistant tuberculosis was estimated by multiplying the estimated incidence of retreated tuberculosis cases of Jilin province in 2009 by the proportion of those cases that were drug-resistant [12]. Analysis was performed using SPSS14.0 software (SPSS Inc, Chicago, USA), and statistical description and statistical inference were conducted using the surveyfreq and surveylogistic process. The level of significance of univariate analysis was 0.05, and that for inclusion in the multivariate model was 0.15. The corrected  $R^2$  was used as the standard for model screening.

## Results

From October 1, 2008, to July 31, 2009, 1,830 TB patients were enrolled, including 1,200 new patients and 630 re-treated patients. Of these, 59 (3.2%) patients were not enrolled for final analysis due to negative cultures or contamination. The total of 1,771 TB patients included 1,174 new smear-positive TB patients and 597 re-treated, smear-positive TB patients. Together, these patients were more than the minimum sample size, which could represent the status of drug-resistant TB in Jilin Province.

## Incidence and Proportion of Drug-resistant TB Cases

In this survey, the proportion of new and re-treated, smear-positive TB patients resistant to at least one of the first-line anti-TB drugs was 32.2% and 53.0%, respectively. Overall, the proportion of new and re-treated, smear-positive TB patients resistant to four first-line anti-TB drugs (isoniazid, rifampin, ethambutol, and streptomycin) was 17.3% and 36.4% for isoniazid; 10.6% and 28.9% for rifampin; 4.4% and 11.9% for ethambutol; and 26.4% and 39.1% for streptomycin, respectively (Table 1).

With regard to the proportion of MDR-TB patients, 8.6% of new TB patients and 23.2% of re-treated TB patients were MDR-TB patients, resistant to both rifampin and isoniazid (Table 1). With regard to the proportion of XDR-TB patients, 13.9% of new MDR-TB patients and 10.9% of re-treated MDR-TB patients were XDR-TB patients. The proportion of new and re-treated MDR-TB patients resistant to one of the two second-line anti-TB drugs (ofloxacin and kanamycin) was 26.7% and 40.7%, respectively. Moreover, 1.2% of new smear-positive TB patients and 2.5% of re-treated, smear-positive TB patients were XDR-TB patients in Jilin Province (Table 1).

Consequently, we estimate that approximately 1,290 new MDR-TB cases (95% CI, 1070 to 1510) occur annually in Jilin Province, including 810 new TB patients (95% CI, 660 to 960) and 480 re-treated TB patients (95% CI, 410 to 550). It was also estimated that 160 XDR-TB cases (95% CI, 80 to 240) occur annually in Jilin Province, including 110 new TB patients (95% CI, 55 to 165) and 50 re-treated TB patients (95% CI, 25 to 75).

## Risk Factors for Drug-resistant TB

Based on patient treatment history, we analyzed the influence of various surveyed factors on drug resistance and multidrug resistance among new and re-treated TB patients. Among new

**Table 1. Resistance to first- and second-line antituberculosis drugs.**

|                                                          | New cases (N = 1174) |           | Re-treated cases (N = 597) |           |
|----------------------------------------------------------|----------------------|-----------|----------------------------|-----------|
|                                                          | n (%)                | 95% CI    | n (%)                      | 95% CI    |
| Susceptibility to all four first-line drugs <sup>†</sup> | 796 (67.7)           | 65.1–70.4 | 280 (47.0)                 | 43.0–51.0 |
| Any resistance to first-line drugs                       | 378 (32.3)           | 29.6–34.9 | 317 (53.0)                 | 49.0–57.0 |
| Isoniazid (INH)                                          | 202 (17.3)           | 15.1–19.4 | 218 (36.4)                 | 32.5–40.3 |
| Rifampin (RMP)                                           | 125 (10.6)           | 8.9–12.4  | 172 (28.9)                 | 25.2–32.5 |
| Ethambutol (EMB)                                         | 52 (4.4)             | 3.2–5.6   | 70 (11.9)                  | 9.2–14.3  |
| Streptomycin (SM)                                        | 310 (26.4)           | 23.9–28.9 | 233 (39.1)                 | 35.2–43.0 |
| Resistance to INH or RMP                                 | 126 (11.7)           | 9.8–13.7  | 113 (24.6)                 | 20.7–28.6 |
| Multidrug resistance (MDR) <sup>‡</sup>                  | 101 (8.6)            | 7.0–10.2  | 138 (23.2)                 | 19.8–26.5 |
| Susceptibility to ofloxacin (OFX) and kanamycin (KM)     | 1084 (92.3)          | 90.7–93.8 | 505 (84.7)                 | 81.8–87.6 |
| Any resistance to OFX or KM                              | 91 (7.7)             | 6.2–9.3   | 91 (15.3)                  | 12.4–18.2 |
| OFX resistance                                           | 66 (5.6)             | 4.3–6.9   | 68 (11.4)                  | 2.7–4.8   |
| KM resistance                                            | 44 (3.7)             | 2.7–4.8   | 43 (7.2)                   | 5.1–9.3   |
| MDR + resistance to OFX or KM                            | 64 (5.6)             | 4.2–6.9   | 74 (12.8)                  | 10.0–15.5 |
| Extensive drug resistance <sup>¥</sup>                   | 14 (1.2)             | 0.6–1.8   | 15 (2.5)                   | 1.3–3.8   |

<sup>†</sup> First-line antituberculosis drugs include isoniazid, rifampin, ethambutol, and streptomycin; second-line antituberculosis drugs include ofloxacin and kanamycin.

<sup>‡</sup> Multidrug resistance was defined as resistance to at least isoniazid and rifampin.

<sup>¥</sup> Extensive drug resistance was defined as resistance to at least isoniazid, rifampin, ofloxacin, and kanamycin.

doi:10.1371/journal.pone.0117361.t001

TB patients, we found the various surveyed factors had no influence on the distribution of drug and multidrug resistance, including sex, age, ethnicity and contact history ( $P > 0.05$ ). For re-treated TB patients, several social and clinical characteristics, including sex, age and treatment history, also had no influence on the distribution of drug and multidrug resistance ( $P > 0.05$ , [S2 Table](#)), while our statistical results showed that the risk factors for MDR-TB include being a retiree or unemployed, having an academic background above high school level, and having an annual income of more than 20,000 Yuan. The analysis also showed that the risk of MDR-TB for patients whose last treatment was performed in a general hospital was significantly lower than that of patients whose last treatment was performed in other medical institutions ( $P = 0.036$ ) ([Table 2](#)). Multivariate analysis was performed on the above four factors, and the results showed that people with academic backgrounds above high school level and annual incomes of more than 20,000 Yuan were more susceptible to MDR-TB ([Table 3](#)).

### Analysis of Last Treatment Status of Re-treated TB Patients

Among 597 re-treated TB patients surveyed, 395 (66.2%) patients completed their final course of treatment, and 202 (33.8%) patients did not. Among patients who completed the last course of treatment, the proportions of medical institutions providing the last treatment were: 59.4% (TB control and prevention institutions of the CDC); 19.3% (TB hospitals); 18.5% (general hospitals); 1.3% (private clinics); and 1.5% (other medical institutions). Among patients who did not complete the last treatment course, the above proportions were 31.7%, 28.2%, 26.2%, 4.4%, and 9.9%, respectively ([Fig. 1](#)). Statistical analysis revealed that the distribution of re-treated patients between completed group and not completed group was significantly different

**Table 2. Univariate analysis of risk factors for drug-resistant tuberculosis (TB) in re-treated TB cases\*.**

| Characteristics                                        | A: Pan-sensitive TB <sup>†</sup> |      | B: Drug-resistant TB <sup>‡</sup> |      | Odds ratio [B/A] (95% CI) | P value [B/A] | C: Multidrug-resistant TB <sup>¥</sup> |      | Odds ratio [C/A] (95% CI) | P value [C/A] |
|--------------------------------------------------------|----------------------------------|------|-----------------------------------|------|---------------------------|---------------|----------------------------------------|------|---------------------------|---------------|
|                                                        | n/N                              | %    | n/N                               | %    |                           |               | n/N                                    | %    |                           |               |
| <b>Occupation</b>                                      |                                  |      |                                   |      |                           |               |                                        |      |                           |               |
| Farmer                                                 | 182/280                          | 65.0 | 211/317                           | 66.6 | 1.0 (Ref.)                |               | 79/138                                 | 57.2 | 1.0 (Ref.)                |               |
| Retired/unemployed                                     | 76/280                           | 27.1 | 76/317                            | 24.0 | 0.863 (0.593–1.255)       | 0.439         | 43/138                                 | 31.2 | 1.568 (1.019–2.412)       | 0.041         |
| Worker and others <sup>¶</sup>                         | 22/280                           | 7.9  | 30/317                            | 9.5  | 1.176 (0.655–2.111)       | 0.658         | 16/138                                 | 11.6 | 1.675 (0.835–3.361)       | 0.191         |
| <b>Education</b>                                       |                                  |      |                                   |      |                           |               |                                        |      |                           |               |
| Illiteracy                                             | 30/280                           | 10.7 | 31/317                            | 9.8  | 1.0 (Ref.)                |               | 8/138                                  | 5.8  | 1.0 (Ref.)                |               |
| Elementary and middle schools                          | 208/280                          | 74.3 | 244/317                           | 77.0 | 1.135 (0.665–1.938)       | 0.642         | 103/138                                | 74.6 | 1.955 (0.901–4.245)       | 0.09          |
| High school or above                                   | 42/280                           | 15.0 | 42/317                            | 13.2 | 0.945 (0.488–1.830)       | 0.866         | 27/138                                 | 19.6 | 3.194 (1.333–7.653)       | <0.01         |
| <b>Annual income</b>                                   |                                  |      |                                   |      |                           |               |                                        |      |                           |               |
| 4200 yuan                                              | 111/273                          | 40.7 | 129/304                           | 42.4 | 1.0 (Ref.)                |               | 54/133                                 | 40.6 | 1.0 (Ref.)                |               |
| 4200~20,000 yuan                                       | 148/273                          | 54.2 | 149/304                           | 49.0 | 0.860 (0.612–1.210)       | 0.388         | 63/133                                 | 47.4 | 0.931 (0.617–1.405)       | 0.735         |
| >20,000 yuan                                           | 14/273                           | 5.1  | 26/304                            | 8.5  | 1.598 (0.796–3.210)       | 0.188         | 16/133                                 | 12.0 | 2.296 (1.139–4.631)       | 0.02          |
| <b>Medical institution providing last TB treatment</b> |                                  |      |                                   |      |                           |               |                                        |      |                           |               |
| TB dispensary system                                   | 131/280                          | 46.8 | 155/317                           | 48.9 | 1.0 (Ref.)                |               | 78/138                                 | 56.5 | 1.0 (Ref.)                |               |
| TB hospital                                            | 56/280                           | 20.0 | 68/317                            | 21.5 | 0.665 (0.441–1.002)       | 0.051         | 30/138                                 | 21.7 | 0.822 (0.507–1.330)       | 0.424         |
| General hospital                                       | 72/280                           | 25.7 | 84/317                            | 26.5 | 0.981 (0.645–1.491)       | 0.927         | 21/138                                 | 15.2 | 0.564 (0.330–0.963)       | 0.036         |
| Private hospital/clinic                                | 6/280                            | 2.1  | 5/317                             | 1.6  | 0.915 (0.300–2.789)       | 0.876         | 2/138                                  | 1.4  | 0.513 (0.111–2.365)       | 0.392         |
| Others                                                 | 15/280                           | 5.4  | 5/317                             | 1.6  | 0.575 (0.256–1.294)       | 0.181         | 7/138                                  | 5.1  | 1.039 (0.421–2.567)       | 0.934         |
| <b>Supervisor for taking medicine</b>                  |                                  |      |                                   |      |                           |               |                                        |      |                           |               |
| Doctor                                                 | 104/280                          | 37.1 | 126/317                           | 39.7 | 1.0 (Ref.)                |               | 62/138                                 | 44.9 | 1.0 (Ref.)                |               |
| Family                                                 | 49/280                           | 17.5 | 74/317                            | 23.3 | 1.230 (0.788–1.920)       | 0.363         | 23/138                                 | 16.7 | 0.630 (0.367–1.079)       | 0.092         |
| Patient                                                | 122/280                          | 43.6 | 114/317                           | 36.0 | 0.771 (0.536–1.110)       | 0.162         | 50/138                                 | 36.2 | 0.728 (0.475–1.116)       | 0.146         |
| Others                                                 | 5/280                            | 1.8  | 3/317                             | 0.9  | 0.495 (0.116–2.121)       | 0.344         | 3/138                                  | 2.2  | 1.626 (0.377–7.005)       | 0.514         |

\* Only results for variables included in final multivariate model are presented; additional results are available in web-only supplement. Calculation of odds ratios takes into account the clustered design; therefore, the odds ratios presented in the table may not be reproducible simply from data in the table.

<sup>†</sup> Pan-sensitive TB is tuberculosis that is susceptible to the four first-line antituberculosis drugs (isoniazid, rifampin, ethambutol, and streptomycin) in this survey.

<sup>‡</sup> Drug-resistant TB is tuberculosis with drug resistance to any of the antituberculosis drugs in the survey.

<sup>¥</sup> Multidrug-resistant TB is tuberculosis with resistance to both isoniazid and rifampin.

<sup>¶</sup> Others include students, detainees, teachers, doctors, businesspeople, and public officers.

doi:10.1371/journal.pone.0117361.t002

( $P < 0.01$ ). With regard to the 202 re-treated patients who did not complete the last treatment course, the first cause of discontinuing treatment was clinical remission deemed by the patient (55.9%), the second cause was economic hardship (25.7%), and the third cause was adverse drug reactions (13.9%) (Fig. 2).



**Table 3. Multivariate analysis of risk factors for drug-resistant tuberculosis (TB) in re-treated TB cases.**

| Characteristics            | Drug-resistant TB*<br>Adjusted odds ratio (95% CI) | Multidrug-resistant TB†<br>Adjusted odds ratio (95% CI) |
|----------------------------|----------------------------------------------------|---------------------------------------------------------|
| Retired/unemployed         | 1.382 (0.640–2.984)                                | 1.333 (0.815–2.178)                                     |
| High school or above       | 1.011 (0.482–2.119)                                | 2.922 (1.200–7.114)                                     |
| Annual income >20,000 yuan | 1.624 (0.788–3.347)                                | 2.107 (1.025–4.333)                                     |
| TB hospital                | 1.071 (0.652–1.758)                                | 0.613 (0.125–3.002)                                     |
| General hospital           | 0.692 (0.445–1.077)                                | 0.602 (0.322–1.125)                                     |
| Family                     | 1.309 (0.834–2.055)                                | 0.739 (0.411–1.332)                                     |

\*Drug-resistant TB is tuberculosis with drug resistance to any antituberculosis drugs in the survey.

† Multidrug-resistant TB is tuberculosis with resistance to both isoniazid and rifampin.

doi:10.1371/journal.pone.0117361.t003

### Discussion

The drug-resistance survey is an important measurement tool for understanding the proportion of drug resistance in a country or region and for formulating drug-resistant TB control strategies, and several regions with high TB burden have carried out the drug-resistance survey in recent years [2, 4, 13–15]. To our best knowledge, this report was the first study on the drug-resistance surveillance in Jilin Province. Data on the proportion of drug-resistant TB have also been reported in ten other provinces of China [16–18]. As compared with drug-resistance data in other provinces, the total drug-resistance status of Jilin Province among re-treated tuberculosis cases is comparable to the national level. But the proportion of rifampin resistance and MDR-TB in new tuberculosis cases is higher than at the national level and comparable to the level of surrounding regions (Liaoning Province, Heilongjiang Province, and Inner Mongolia Autonomous Region) (Tables 4 and 5). The drug resistance proportion among new and re-treated cases patients are considered as important indicators for TB epidemiology [8]. In Jilin,

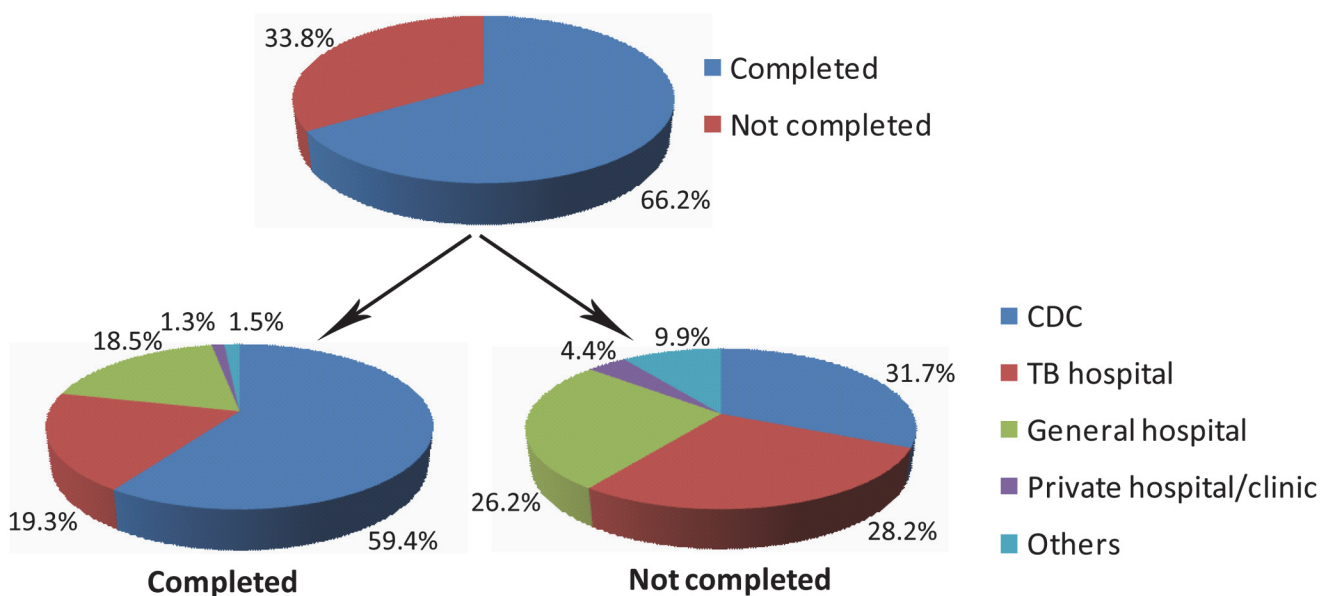

**Fig 1. Proportion of previously treated tuberculosis patients who completed their last treatment course and the location of last treatment.**

doi:10.1371/journal.pone.0117361.g001

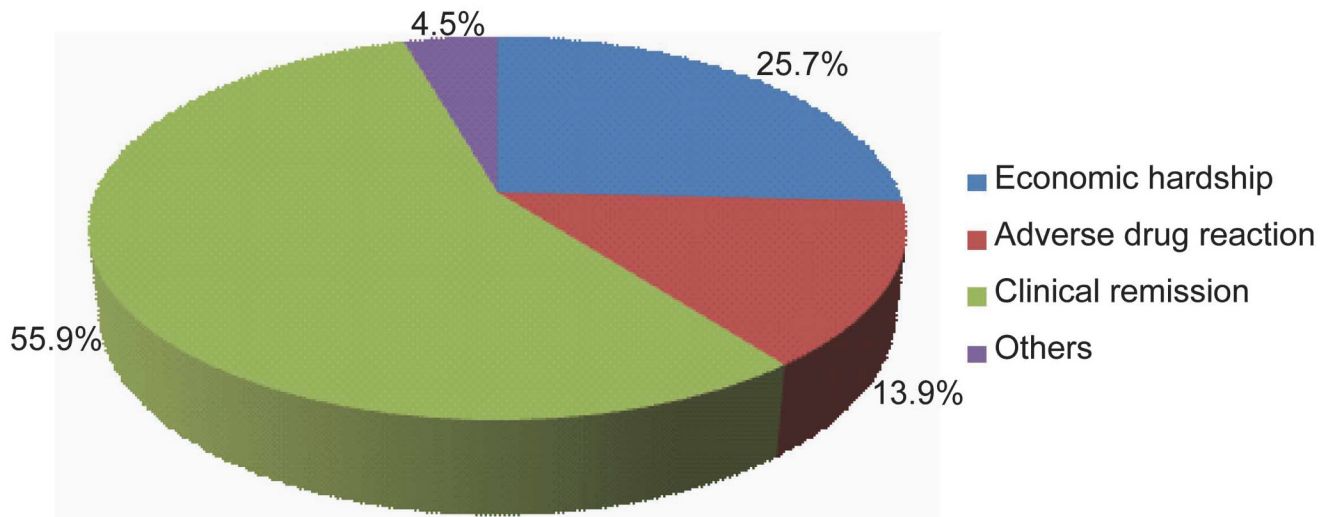

**Fig 2. Reasons for treatment interruption among previously treated tuberculosis patients reported by the patients themselves.** The clinical remission is patient rather than clinician defined.

doi:10.1371/journal.pone.0117361.g002

the higher number of MDR-TB among new cases suggests that the transmission of drug-resistant strains in Jilin is an urgent problem in the MDR-TB control and prevention system of Jilin Province. Unfortunately, basic laboratories in Jilin Province usually did not carry out cultures and conventional DSTs. The proportions of treatment failure, relapse, and secondary drug resistance increase when first-line drugs are used to treat drug-resistant patients. Early diagnosis

**Table 4. Proportion of drug resistance in new tuberculosis cases tested in 11 Chinese provinces.**

| Province              | Method of data collection | Number of patients tested | Any resistance | Resistance to rifampin | Multidrug resistance (MDR) <sup>†</sup> |
|-----------------------|---------------------------|---------------------------|----------------|------------------------|-----------------------------------------|
| North region in China |                           |                           |                |                        |                                         |
| Jilin                 | SVY*                      | 1174                      | 32.3%          | 10.6%                  | 8.6%                                    |
| Heilongjiang          | SVY                       | 1574                      | 36.1%          | 10.6%                  | 7.2%                                    |
| Liaoning              | SVY                       | 818                       | 42.1%          | 11.4%                  | 10.3%                                   |
| Inner Mongolia        | SVY                       | 806                       | 35.0%          | 9.8%                   | 7.3%                                    |
| Beijing               | SVY                       | 1043                      | 17.9%          | 4.2%                   | 2.3%                                    |
| Henan                 | SVY                       | 646                       | 35.0%          | 14.6%                  | 10.9%                                   |
| Shandong              | SVY                       | 1009                      | 17.6%          | 3.8%                   | 2.9%                                    |
| South region in China |                           |                           |                |                        |                                         |
| Shanghai              | SVY                       | 764                       | 15.4%          | 4.8%                   | 3.9%                                    |
| Zhejiang              | SVY                       | 809                       | 14.8%          | 6.4%                   | 4.4%                                    |
| Guangdong             | SVY                       | 1432                      | 18.0%          | 7.1%                   | 5.4%                                    |
| Hubei                 | SVY                       | 859                       | 17.5%          | 3.8%                   | 2.0%                                    |
| China <sup>‡</sup>    | SVY                       | 3037                      | 34.2%          | 6.7%                   | 5.7%                                    |

\*SVY: drug resistance survey.

<sup>†</sup> Multidrug-resistant TB is tuberculosis with resistance to both isoniazid and rifampin.

<sup>‡</sup>The data is cited from National Drug resistance Survey of China.

doi:10.1371/journal.pone.0117361.t004



**Table 5. Proportion of drug resistance in re-treated tuberculosis cases tested in 11 Chinese provinces.**

| Province              | Number of patients tested | Any resistance | Resistance to rifampin | Multidrug resistance (MDR) <sup>†</sup> |
|-----------------------|---------------------------|----------------|------------------------|-----------------------------------------|
| North region in China |                           |                |                        |                                         |
| Jilin                 | 597                       | 53.0%          | 28.9%                  | 23.2%                                   |
| Heilongjiang          | 421                       | 67.5%          | 40.4%                  | 30.4%                                   |
| Liaoning              | 86                        | 55.8%          | 29.1%                  | 24.5%                                   |
| Inner Mongolia        | 308                       | 70.1%          | 51.0%                  | 41.9%                                   |
| Beijing               | 154                       | 35.1%          | 14.9%                  | 11.7%                                   |
| Henan                 | 726                       | 66.0%          | 43.5%                  | 34.4%                                   |
| Shandong              | 220                       | 50.0%          | 25.1%                  | 23.2%                                   |
| South region in China |                           |                |                        |                                         |
| Shanghai              | 200                       | 27.5%          | 15.0%                  | 12.5%                                   |
| Zhejiang              | 145                       | 59.3%          | 44.1%                  | 34.5%                                   |
| Guangdong             | 166                       | 33.7%          | 19.9%                  | 15.6%                                   |
| Hubei                 | 238                       | 44.5%          | 26.9%                  | 21.9%                                   |
| China                 | 892                       | 54.5%          | 29.4%                  | 25.6%                                   |

doi:10.1371/journal.pone.0117361.t005

of the above-mentioned patients is therefore essential to conduct effective individualized treatment. The use of the conventional DST in county-level laboratories is limited because of the additional time and biosafety requirements involved. Recently, WHO recommended the GeneXpert MTB/RIF test that can be used in the early detection of MDR-TB cases and HIV/TB cases (an MDR-TB-susceptible population) [17–20]. The application of molecular diagnosis tools may serve as a candidate solution for the dilemma between limit-resource setting and early diagnosis of drug-resistant tuberculosis in Jilin Province.

Previous studies have shown that among re-treated TB patients in China, risk factors for acquiring MDR-TB included being female and the number of treatments [21]. Our survey identified several unique risk factors for MDR-TB related to the regional features. First of all, the retirees and unemployed faced higher risks for MDR-TB in Jilin, which may be attributed to local climate and living habits. Jilin Province located in the cooler northeast region of China, where people tend to stay indoors for much of the year in buildings that may have poor ventilation in order to maintain a warmer indoor air temperature. In addition, the retirees were usually older than 60 years, and the weakened immune system of retirees may also responsible for high risk of MDR-TB. For the unemployed people, they always suffered great pressure and poor nutritional status, which served as another important reason for high risk. Furthermore, we found that people with higher academic backgrounds and higher incomes are at higher risk for MDR-TB. Numerous literature reports have shown that compliance with clinical treatment can be poor among people in these categories [22, 23]. The poor compliance and more prior treatments among the well-educated group possibly lead to MDR-TB.

Treatment discontinuation is considered as one of the risk factors for MDR-TB [24, 25–27]. In Jilin, patients whose treatment was not completed mainly came from TB hospitals and general hospitals. Although TB control and prevention institutions in the CDC system have professional follow-up systems, the patients from the hospital systems sometimes are missed due to the loss of transfer from hospital system to local TB dispensary system, who may not complete their follow-up treatment, serving as the high risk group of drug resistance [21]. Among patients whose last treatments were discontinued, the main causes were clinical remission as determined by the patient. This indicates that TB health education needs to be further strengthened. In addition, the economic hardship served as another major reason responsible for last treatment

interruption. In Jilin, although the local TB dispensaries provide free treatment for tuberculosis patients, they must afford the cost for auxiliary treatment, including liver protectants and other drugs for reducing adverse reactions. The economic burden is higher for those receiving anti-TB treatments in hospital system, who have to afford more than 30% of the entire medical expenses in hospitals. Hence, economic assistance should be available to ensure TB patients with economic hardship can complete treatment, thus reducing the emergence of drug-resistant TB.

This survey has some limitations. First, this study enrolled the smear positive TB patients rather than all TB patients. Hence, the drug susceptibility profiles of smear negative/culture positive patients are still unknown. Second, patient HIV infection data were not collected. In China, routine HIV examination is not performed in TB patients, because the prevalence of HIV infection is assumed to be low. Due to higher HIV prevalence among TB patients than among the general population in China [28], HIV screening among TB patients will allow us to investigate the prevalence of HIV among tuberculosis patients in Jilin Province. Third, the patients seeking health care in the hospitals were not included in this study. As the high risk group of drug-resistant tuberculosis, the bias enrollment of those patients may result in the probable underestimation of the burden of drug-resistant tuberculosis in Jilin Province. Fourth, the burden of XDR tuberculosis was underestimated because only kanamycin rather than capreomycin or other second-line injectable aminoglycosides was used to identify XDR tuberculosis. Fifth, in this survey, all the risk factor data were obtained from patient interviews, which may have affected the accuracy of the data, a limitation that should be remedied in subsequent surveys. Sixth, the comorbidities in XDR-TB patient was another neglected issue in this study.

Overall, the survey results showed that Jilin Province remains one of the areas with the highest drug-resistant TB burden in China. The higher proportion of MDR-TB among new cases suggested that the transmission of drug-resistant strains in Jilin is an urgent problem in the MDR-TB control and prevention system of Jilin Province. Our results also revealed some risk factors for MDR-TB, including employment status, educational background, and income level. The survey also showed that health services should strengthen their systems to ensure better follow-up with TB patients to ensure they complete their course of treatment, and that strengthening health education and increasing financial investment could reduce the proportion of MDR-TB. The results provide a theoretical basis for formulating an appropriate Jilin Province TB control and prevention program.

## Supporting Information

### S1 Table. The questionnaire in this study

(DOCX)

### S2 Table. Univariate analysis of risk factors ( $P$ value > 0.15) for drug-resistant tuberculosis (TB) in re-treated TB cases

(DOCX)

## Acknowledgments

We thank the local CDC staffs for their help in carrying on this survey and Dr. Jack Zhang for assistance with wording.

## Author Contributions

Conceived and designed the experiments: XY YY YP MF YZ. Performed the experiments: XY YY YP BW YB YW BY MF YZ. Analyzed the data: XY YY YP ZZ MF YZ. Contributed reagents/materials/analysis tools: YW. Wrote the paper: XY YY YP BW YB YW ZZ MF YZ.

## References

1. Yumo HA, Mbanya D, Kuaban C, Neuhann F (2011) Outcome assessment of a Global Fund grant for tuberculosis control at the district level in rural Cameroon. *Int J Tuberc Lung Dis* 15: 352–357. PMID: [21333102](#)
2. Wang L, Liu J, Chin DP (2007) Progress in tuberculosis control and the evolving public-health system in China. *Lancet* 369: 691–696. PMID: [17321314](#)
3. Pang Y, Zhou Y, Zhao B, Liu G, Jiang G, et al. (2012) Spoligotyping and drug resistance analysis of *Mycobacterium tuberculosis* strains from national survey in China. *PLoS One* 7: e32976. doi: [10.1371/journal.pone.0032976](#) PMID: [22412962](#)
4. Zhao Y, Xu S, Wang L, Chin DP, Wang S, et al. (2012) National survey of drug-resistant tuberculosis in China. *N Engl J Med* 366: 2161–2170. doi: [10.1056/NEJMoa1108789](#) PMID: [22670902](#)
5. World Health Organization (2014) Global tuberculosis report 2014. World Health Organization, WHO/HTM/TB/2014.08.
6. Yang Y, Li X, Zhou F, Jin Q, Gao L (2011) Prevalence of drug-resistant tuberculosis in mainland China: systematic review and meta-analysis. *PLoS One* 6: e20343. doi: [10.1371/journal.pone.0020343](#) PMID: [21674033](#)
7. Huang F, Cheng SM, Du X, Chen W, Wang LX (2010) Spatial analysis on new smear-positive pulmonary tuberculosis in China, 2003–2008. *Zhonghua Liu Xing Bing Xue Za Zhi* 31: 1276–1279. PMID: [21176692](#)
8. He GX, Zhao YL, Jiang GL, Liu YH, Xia H, et al. (2008) Prevalence of tuberculosis drug resistance in 10 provinces of China. *BMC Infect Dis* 8: 166. doi: [10.1186/1471-2334-8-166](#) PMID: [19077223](#)
9. Zhao Y, Feng Q, Tang K, Zhang C, Sun H, et al. (2012) The population structure of drug-resistant *Mycobacterium tuberculosis* clinical isolates from Sichuan in China. *Infect Genet Evol* 12: 718–724. doi: [10.1016/j.meegid.2011.09.022](#) PMID: [21989209](#)
10. Wright A, Zignol M, Van Deun A, Falzon D, Gerdes SR, et al. (2009) Epidemiology of antituberculosis drug resistance 2002–07: an updated analysis of the Global Project on Anti-Tuberculosis Drug Resistance Surveillance. *Lancet* 373: 1861–1873. doi: [10.1016/S0140-6736\(09\)60331-7](#) PMID: [19375159](#)
11. World Health Organization (2003) Guidelines for surveillance of drug resistance in tuberculosis. Geneva, WHO/CDC/TB/2003.313.
12. World Health Organization (2010) Multidrug and extensively drug-resistant TB (M/XDR-TB): 2010 global report on surveillance and response. Geneva, WHO/HTM/TB/2010.3.
13. Ramachandran R, Nalini S, Chandrasekar V, Dave PV, Sanghvi AS, et al. (2009) Surveillance of drug-resistant tuberculosis in the state of Gujarat, India. *Int J Tuberc Lung Dis* 13:1154–1160. PMID: [19723407](#)
14. Javaid A, Hasan R, Zafar A, Ghafoor A, Pathan AJ, et al. (2008) Prevalence of primary multidrug resistance to anti-tuberculosis drugs in Pakistan. *Int J Tuberc Lung Dis* 12:326–331. PMID: [18284840](#)
15. Zignol M, van Gemert W, Falzon D, Sismanidis C, Glaziou P, et al. (2012) Surveillance of anti-tuberculosis drug resistance in the world: an updated analysis, 2007–2010. *Bull World Health Organ* 90:111–119. doi: [10.2471/BLT.11.092585](#) PMID: [22423162](#)
16. Chonde TM, Basra D, Mfinanga SG, Range N, Lwilla F, et al. (2010) National anti-tuberculosis drug resistance study in Tanzania. *Int J Tuberc Lung Dis* 14: 967–972. PMID: [20626940](#)
17. Boehme CC, Nabeta P, Hillemann D, Nicol MP, Shenai S, et al. (2010) Rapid molecular detection of tuberculosis and rifampin resistance. *N Engl J Med* 363: 1005–1015. doi: [10.1056/NEJMoa0907847](#) PMID: [20825313](#)
18. Chakravorty S, Aladegbami B, Thoms K, Lee JS, Lee EG, et al. (2011) Rapid detection of fluoroquinolone-resistant and heteroresistant *Mycobacterium tuberculosis* by use of sloppy molecular beacons and dual melting-temperature codes in a real-time PCR assay. *J Clin Microbiol* 49: 932–940. doi: [10.1128/JCM.02271-10](#) PMID: [21191047](#)
19. Boehme CC, Nicol MP, Nabeta P, Michael JS, Gotuzzo E, et al. (2011) Feasibility, diagnostic accuracy, and effectiveness of decentralised use of the Xpert MTB/RIF test for diagnosis of tuberculosis and multidrug resistance: a multicentre implementation study. *Lancet* 377: 1495–1505. doi: [10.1016/S0140-6736\(11\)60438-8](#) PMID: [21507477](#)
20. Evans CA (2011) GeneXpert—a game-changer for tuberculosis control? *PLoS Med* 8: e1001064. doi: [10.1371/journal.pmed.1001064](#) PMID: [21814497](#)
21. Wang X, Fu Q, Li Z, Chen S, Liu Z, et al. (2012) Drug-resistant tuberculosis in Zhejiang Province, China, 1999–2008. *Emerg Infect Dis* 18:496–498. doi: [10.3201/eid1803.110760](#) PMID: [22377167](#)
22. Ayisi JG, van't Hoog AH, Agaya JA, McHembere W, Nyamthimba PO, et al. (2011) Care seeking and attitudes towards treatment compliance by newly enrolled tuberculosis patients in the district treatment

- programme in rural western Kenya: a qualitative study. *BMC Public Health* 11:515. doi: [10.1186/1471-2458-11-515](https://doi.org/10.1186/1471-2458-11-515) PMID: [21714895](https://pubmed.ncbi.nlm.nih.gov/21714895/)
23. Bashour H, Mamaree F (2003) Gender differences and tuberculosis in the Syrian Arab Republic: patients' attitudes, compliance and outcomes. *East Mediterr Health J* 9: 757–768. PMID: [15748072](https://pubmed.ncbi.nlm.nih.gov/15748072/)
  24. Orenstein EW, Basu S, Shah NS, Andrews JR, Friedland GH, et al. (2009) Treatment outcomes among patients with multidrug-resistant tuberculosis: systematic review and meta-analysis. *Lancet Infect Dis* 9: 153–161. doi: [10.1016/S1473-3099\(09\)70041-6](https://doi.org/10.1016/S1473-3099(09)70041-6) PMID: [19246019](https://pubmed.ncbi.nlm.nih.gov/19246019/)
  25. Faustini A, Hall AJ, Perucci CA (2005) Tuberculosis treatment outcomes in Europe: a systematic review. *Eur Respir J* 26: 503–510. PMID: [16135735](https://pubmed.ncbi.nlm.nih.gov/16135735/)
  26. Franke MF, Appleton SC, Bayona J, Arteaga F, Palacios E, et al. (2008) Risk factors and mortality associated with default from multidrug-resistant tuberculosis treatment. *Clin Infect Dis* 46:1844–51. doi: [10.1086/588292](https://doi.org/10.1086/588292) PMID: [18462099](https://pubmed.ncbi.nlm.nih.gov/18462099/)
  27. Kritski AL, Rodrigues de Jesus LS, Andrade MK, Werneck-Barroso E, Vieira MA, et al. (1997) Retreatment tuberculosis cases. Factors associated with drug resistance and adverse outcomes. *Chest* 111: 1162–1167. PMID: [9149564](https://pubmed.ncbi.nlm.nih.gov/9149564/)
  28. Wu Z, Wang Y (2010) Introduction: China meets new AIDS challenges. *J Acquir Immune Defic Syndr* 53: S1–3. doi: [10.1097/QAI.0b013e3181c7d379](https://doi.org/10.1097/QAI.0b013e3181c7d379) PMID: [20104098](https://pubmed.ncbi.nlm.nih.gov/20104098/)
